# Supplementary material
Source: publisher figshare collection journal article supplement (https://geolsoc.figshare.com/articles/dataset/_/3453350)
Supplement: Supplementary file 1 [file 1]

Field outcrop (dated samples and Nun. Robertson amphibolites)  
photo views.

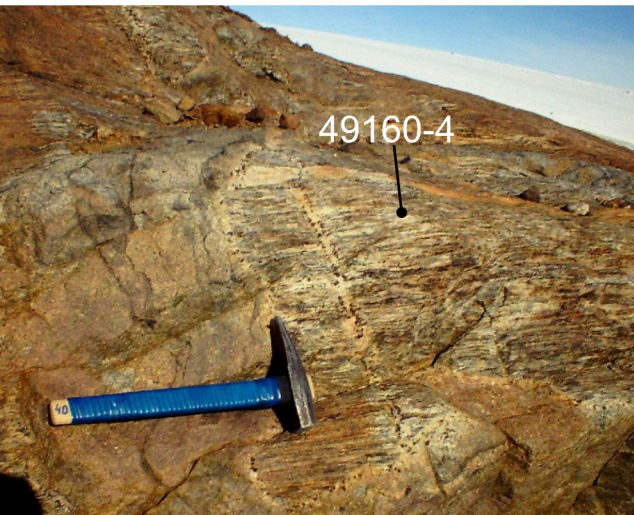

Sample 49160-4, Bt-Opx plagiogneiss, Pickering Nunatak.

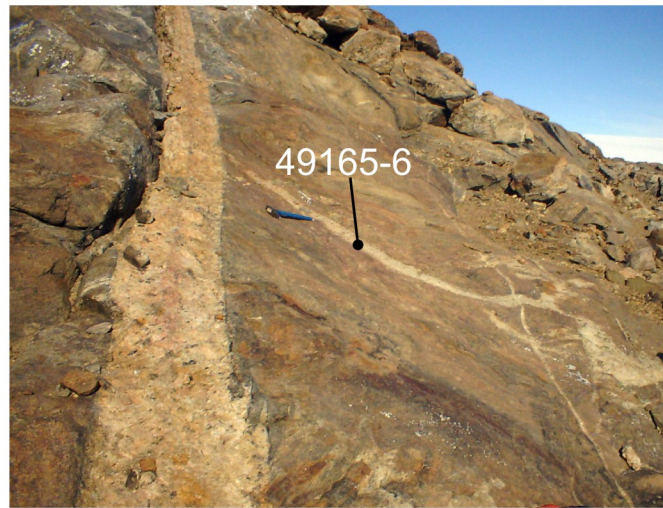

Sample 49165-6, gneissose Bt granite, Haigh Nunatak.

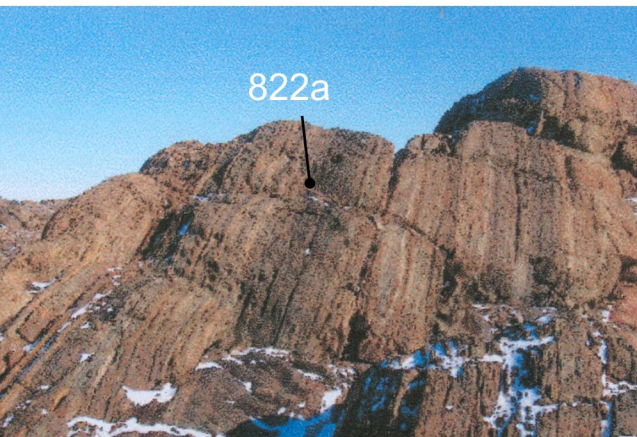

Sample 822a, Opx tonalite-gneiss intercalated with mafic granulite

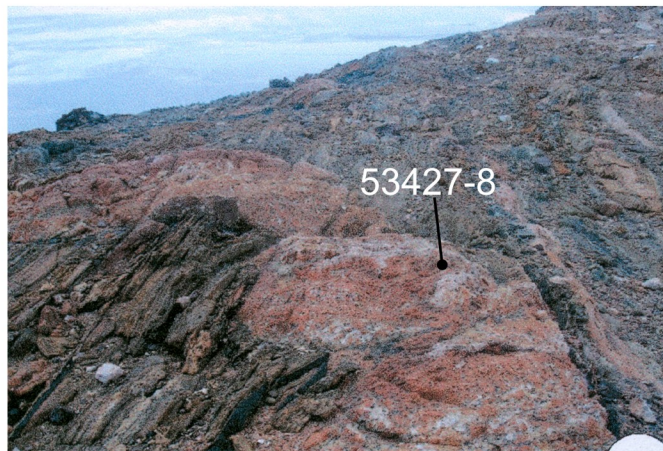

Sample 53427-8, young leucosome (6) in migmatite (a), Sidney Island.

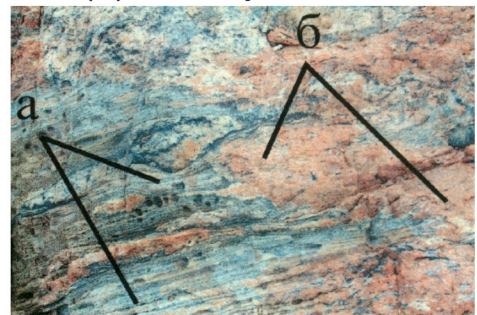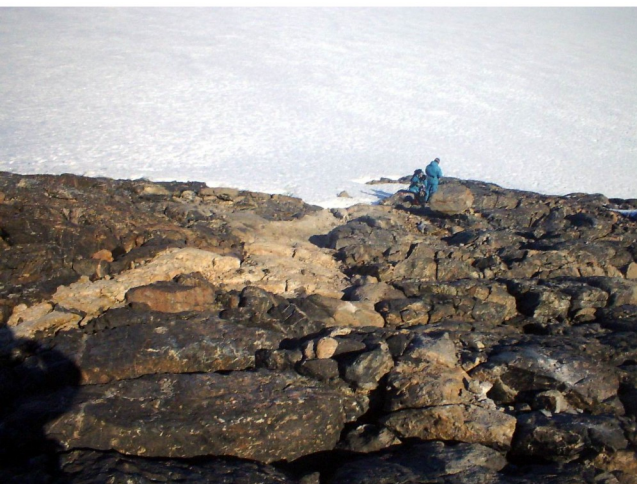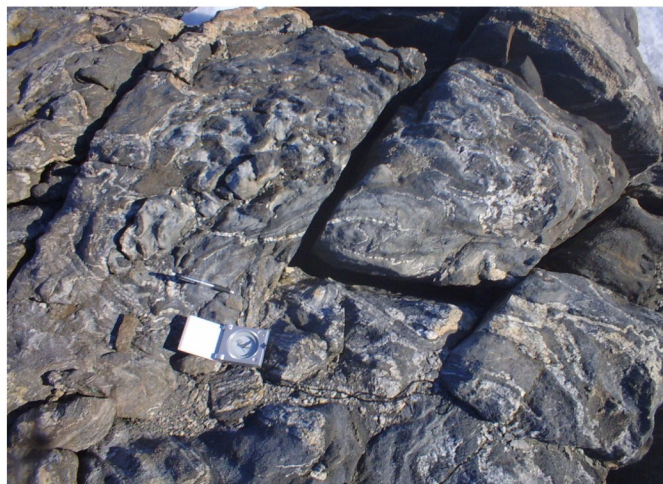

Amphibolite, Robertson Member.
